# Supplementary material for: Validation of the Arabic Version of the Sleep Apnea Scale of the Sleep Disorders Questionnaire (SDQ-SA)
Source: Research Square preprint supplement (doi:10.21203/rs.3.rs-4059877/v1), 2024-04-23
Supplement: Supplementary file 1 [file 50e3a5b86d5e6ded5ffc37f8.docx]

**Table 4. Sensitivity, specificity, positive predictive value and negative predictive value for men and women against different AHI values cut-offs**

| **Parameters** | **AHI≥5** | **AHI≥15** | **AHI≥30** |
| --- | --- | --- | --- |
| Sensitivity% men/women | 87.3%/83.9% | 92.3%/92.6% | 92.3%/93.8% |
| Specificity% men/women | 60%/50% | 43.8%/62.5% | 21.4%/31.6% |
| PPV%  men/women | 96.5%/92.9% | 84.2%/89.3% | 42.1%/53.6% |
| NPV%  men/women | 27.3%/28.6% | 63.6%/71.4% | 81.8%/85.7% |
