# Supplementary material for: Validation of the Arabic Version of the Sleep Apnea Scale of the Sleep Disorders Questionnaire (SDQ-SA)
Source: Research Square preprint supplement (doi:10.21203/rs.3.rs-4059877/v1), 2024-04-23
Supplement: Supplementary file 2 [file 771685b114c584bc68c4f01f.docx]

**Table 2. Answers to the questions of the (SDQ-SA) questionnaire means**

| **Questions of the (SDQ-SA) questionnaire** | **Mean ± sd** |
| --- | --- |
| I am told I snore loudly and bother others | 4.1±0.96 |
| I am told I stop breathing ("hold my breath") in sleep | 3.42±1.04 |
| I awaken suddenly gasping for breath, unable to breathe | 3.18±1.17 |
| I sweat a great deal at night | 2.76±1.09 |
| I have high blood pressure (or once had it) | 2.81±1.67 |
| I have a problem with my nose blocking up when I am trying to sleep (allergies, infections) | 3.05±1.17 |
| My snoring or my breathing problem is much worse if I sleep on my back | 3.82±1.08 |
| My snoring or my breathing problem is much worse if I fall asleep right after drinking alcohol | 1.28±0.82 |
| What is your current weight? | 3.72±0.95 |
| How many years were you a smoker? | 2.97±1.84 |
| How old are you now? | 4.61±0.73 |
| Body Mass Index | 3.92±1.06 |
