# Supplementary material for: Validation of the Arabic Version of the Sleep Apnea Scale of the Sleep Disorders Questionnaire (SDQ-SA)
Source: Research Square preprint supplement (doi:10.21203/rs.3.rs-4059877/v1), 2024-04-23
Supplement: Supplementary file 3 [file 7aa2560c2c5dbcfbec86cdfa.docx]

**Table 3. Results of the (SDQ-SA) questionnaire for different groups of the sample**

| **AHI** | **Low risk**  **n=18(17.5%)** | **High risk**  **n=85(82.5%)** | **Total**  **n=102** |
| --- | --- | --- | --- |
| <5 n(%) | 5(27.8%) | 4(4.7%) | 9 |
| 5to <15 n(%) | 7(38.9%) | 8(9.4%) | 15 |
| 15to <30 n(%) | 3(16.7%) | 34(40%) | 37 |
| >30 n(%) | 3(16.7%) | 39(45.9%) | 42 |
