# Supplementary material for: Validation of the Arabic Version of the Sleep Apnea Scale of the Sleep Disorders Questionnaire (SDQ-SA)
Source: Research Square preprint supplement (doi:10.21203/rs.3.rs-4059877/v1), 2024-04-23
Supplement: Supplementary file 4 [file 9e58a95587e330b3e8e8fd5c.docx]

| **Characteristic** | **Mean ± sd** |
| --- | --- |
| Age(years) | 56.55±8.92 |
| Male gender n(%) | 68 (66%) |
| Weight(kilograms) | 87.15±11.86 |
| Height(meters) | 1.7±0.91 |
| BMI(kg/m^2) | 30.63±5.71 |
| Smokers n(%) | 57 (55.3%) |
| AHI score | 26.52±15.93 |

**Table 1. General Characteristics of the Sample**
